# Supplementary material for: Aim-less translation: loss of Saccharomyces cerevisiae mitochondrial translation initiation factor mIF3/Aim23 leads to unbalanced protein synthesis
Source: PubMed Central journal article supplement (PMC4700529; doi:10.1038/srep18749), 2016-01-05
Supplement: srep18749-s1.pdf [file srep18749-s1.pdf]

## Supplementary Information

### **Aim-less translation: loss of *Saccharomyces cerevisiae* mitochondrial translation initiation factor mIF3/Aim23 leads to unbalanced protein synthesis**

Anton Kuzmenko<sup>1,2</sup>, Ksenia Derbikova<sup>2</sup>, Roger Salvatori<sup>3</sup>, Stoyan Tankov<sup>1</sup>, Gemma C. Atkinson<sup>1,4,5</sup>, Tanel Tenson<sup>1</sup>, Martin Ott<sup>3</sup>, Piotr Kamenski<sup>2,\*</sup> and Vasili Hauryliuk<sup>1,4,5,\*</sup>

<sup>1</sup>University of Tartu, Institute of Technology, Nooruse 1, 50411 Tartu, Estonia

<sup>2</sup>Molecular Biology Department, Faculty of Biology, M.V. Lomonosov Moscow State University, 1/12 Leninskie Gory, 119991 Moscow, Russia

<sup>3</sup>Department of Biochemistry and Biophysics, Center for Biomembrane Research, Stockholm University, SE-106 91 Stockholm, Sweden

<sup>4</sup>Department of Molecular Biology, Umeå University, Building 6K, 6L University Hospital Area, SE-901 87 Umeå, Sweden

<sup>5</sup>Laboratory for Molecular Infection Medicine Sweden (MIMS), Umeå University, Building 6K and 6L, University Hospital Area, SE-901 87 Umeå, Sweden

\* denotes the corresponding authors

#### **Contact details of corresponding authors:**

Piotr Kamenski: piotr.kamenski@gmail.com, +74959395485

Vasili Hauryliuk: vasili.hauryliuk@molbiol.umu.se, +46907850807

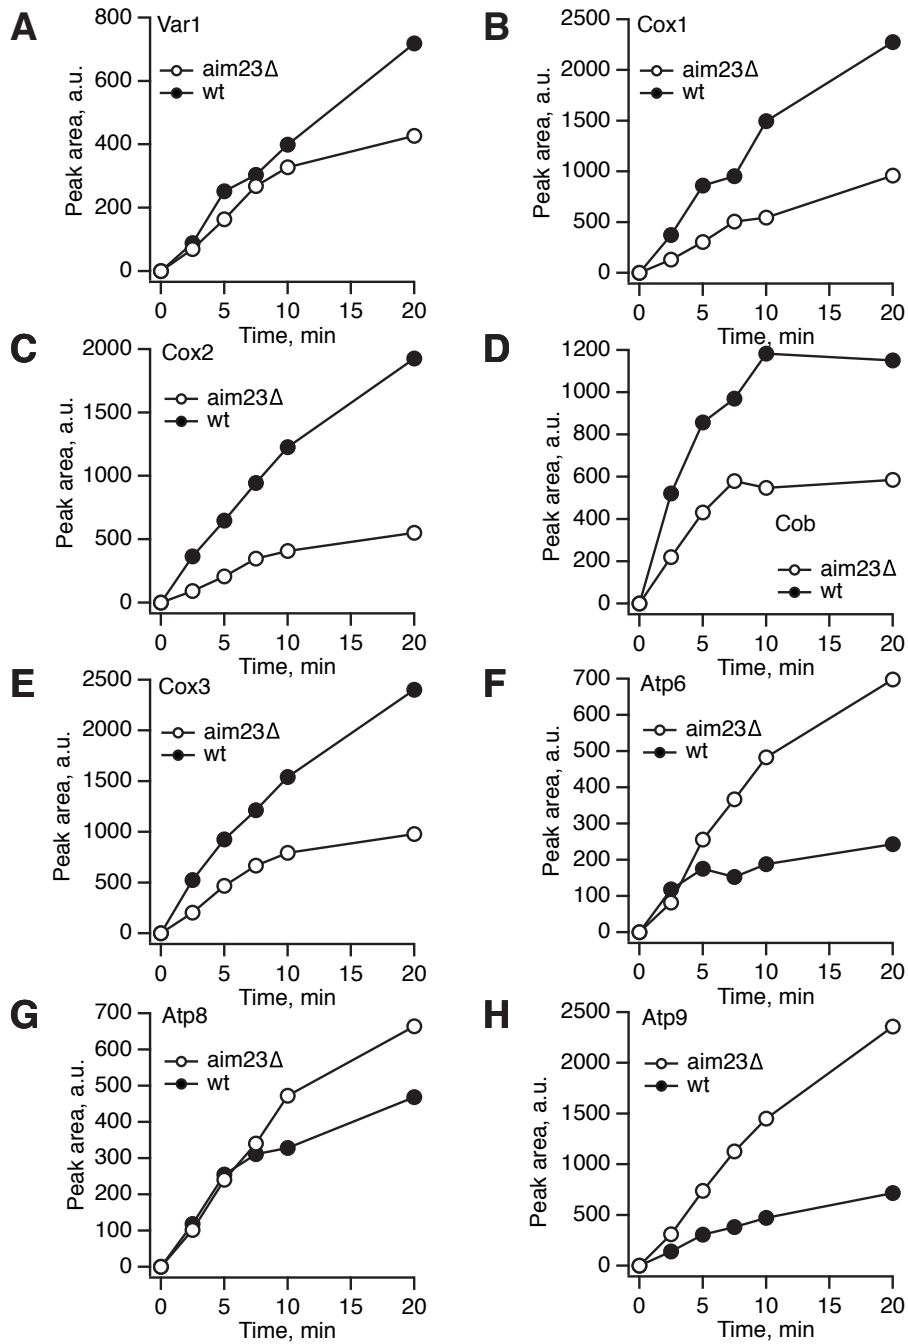

**Supplementary Figure 1 | Kinetics of <sup>35</sup>S-methionine incorporation in newly synthesized mitochondrial proteins.** The experiments were performed using a congenic set of wild type and *aim23Δ* cells in a BY4741 background. The raw data are presented in **Figure 3A**. <sup>35</sup>S-methionine pulse labeling was carried out as per Gouget and colleagues<sup>1</sup>

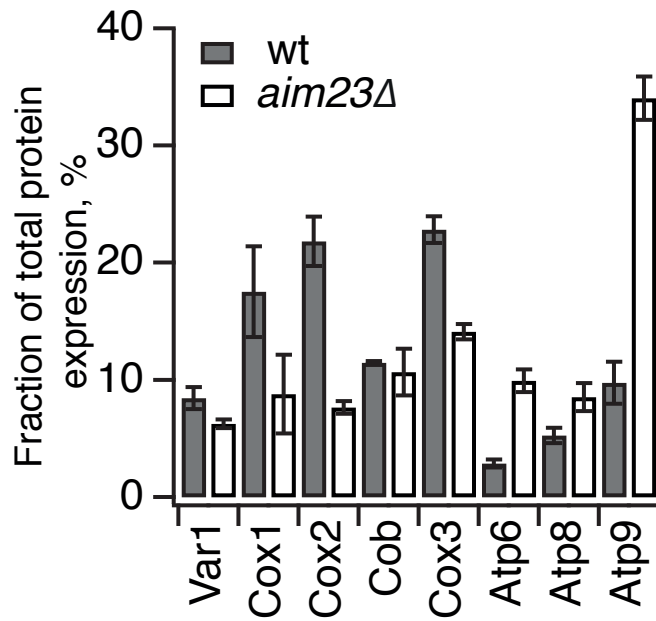

**Supplementary Figure 2 | Levels of mitochondrially-encoded proteins after 20 min labeling with <sup>35</sup>S-methionine.** The relative expression is normalized to total expression of mitochondrially encoded protein genes.

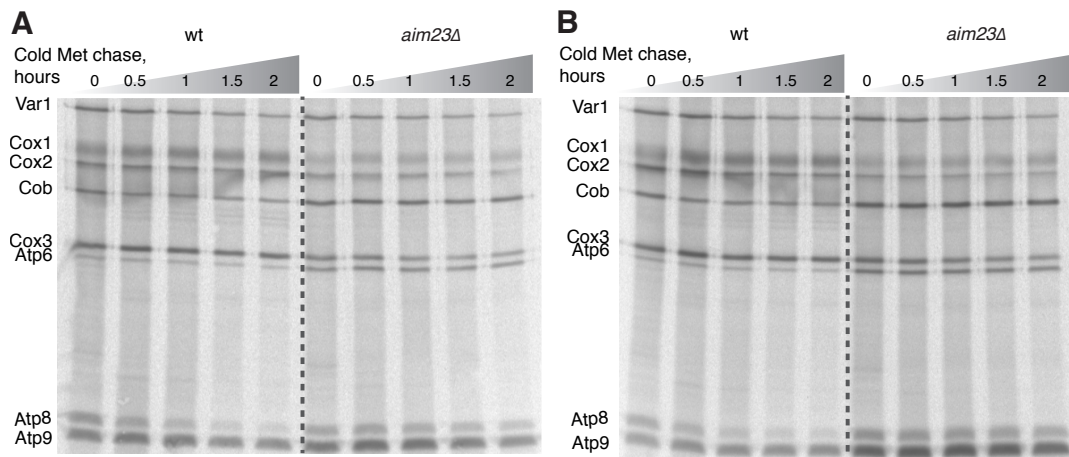

**Supplementary Figure 3 | Turnover of mitochondrially synthesised proteins in wild type and *aim23Δ* strains.** After 15 minutes of  $^{35}\text{S}$  methionine pulse labeling was carried out as per Gouget and colleagues<sup>1</sup>, the labeling reaction was stopped by the addition of cold methionine (final concentration of 80 mM) and puromycin (final concentration of 4  $\mu\text{g}/\text{ml}$ ). Samples were collected after the indicated time points, proteins were resolved on SDS PAGE and visualized by radioautography. Panels (A) and (B) represent two biological replicates.

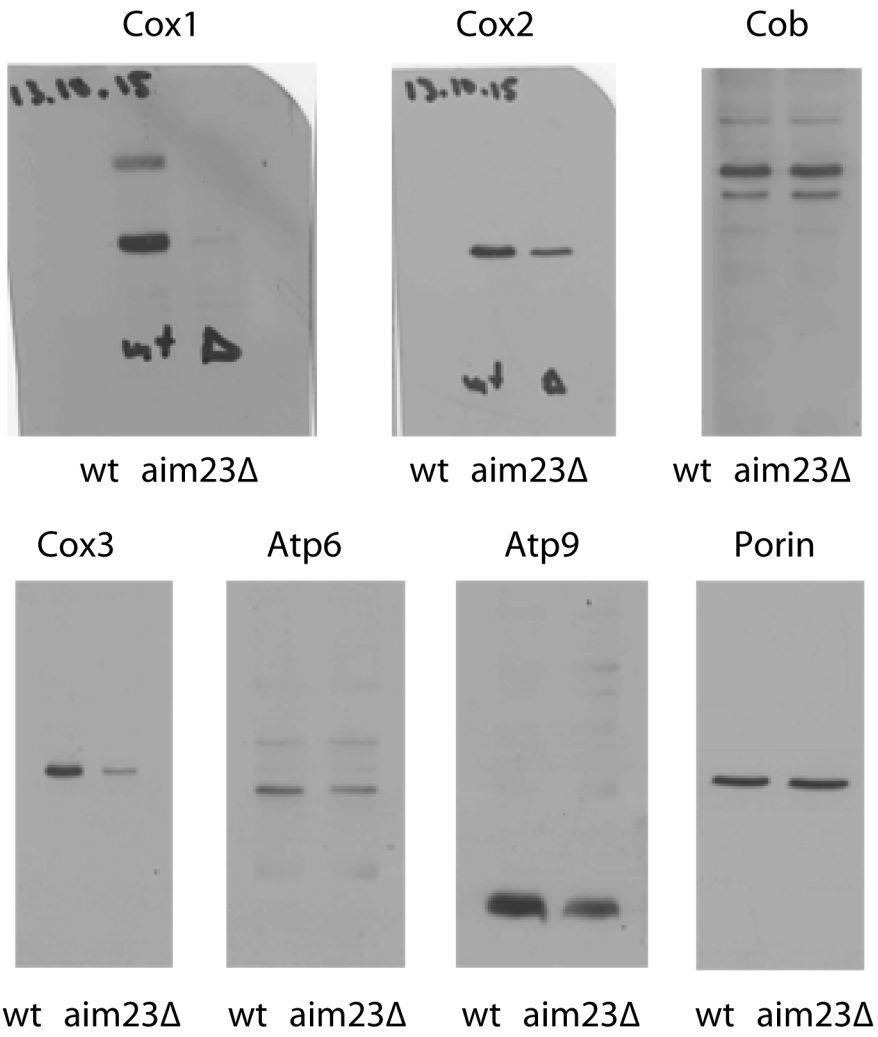

**Supplementary Figure 4 | Unprocessed pictures of Western blots used in this work (see Figure 3D).**

### **Supplementary References:**

1. Gouget, K., Verde, F. & Barrientos, A. In vivo labeling and analysis of mitochondrial translation products in budding and in fission yeasts. *Methods Mol Biol* **457**, 113-24 (2008).
